# Supplementary material
Source: Springer Nature journal article supplement (https://www.springermedizin.de/resource/supplementary/12882_2008_110_MOESM1_ESM.pdf/9453086)
Supplement: MOESM1 [file 9453086]

## Patient Population

### *Inclusion:*

- Stage 4 or 5 CKD patients undergoing HD with planned primary de novo AVF

### *Exclusion:*

- non primary AVF creation or revision.
- medical indication for anti-platelet agents or known intolerance of agents.

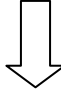

## Stratification

- upper vs. lower arm site
- study centre

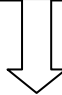

## RANDOMISATION

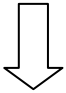

### ARM A

**Aspirin & Omega-3 fatty acids**

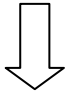

### ARM B

Aspirin placebo and **Omega-3 fatty acids**

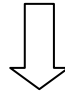

### ARM C

**Aspirin** and Omega-3 fatty acids placebo

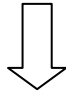

### ARM D

Aspirin placebo & Omega-3 fatty acids placebo

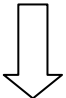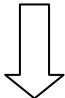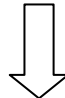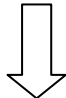

## Endpoints

Primary Endpoint: - patency of AVF at 84 days post creation

Secondary Endpoints: - functional patency of AVF at 6 & 12 months post creation  
- primary patency time  
- secondary patency time
